# Supplementary material for: Cellular heterogeneity in the ureteric progenitor niche and distinct profiles of branching morphogenesis in organ development
Source: Oxford University Press journal article supplement (doi:10.1242/dev.149112), 2017-01-01
Supplement: dev149112supp.pdf [file dev149112supp.pdf]

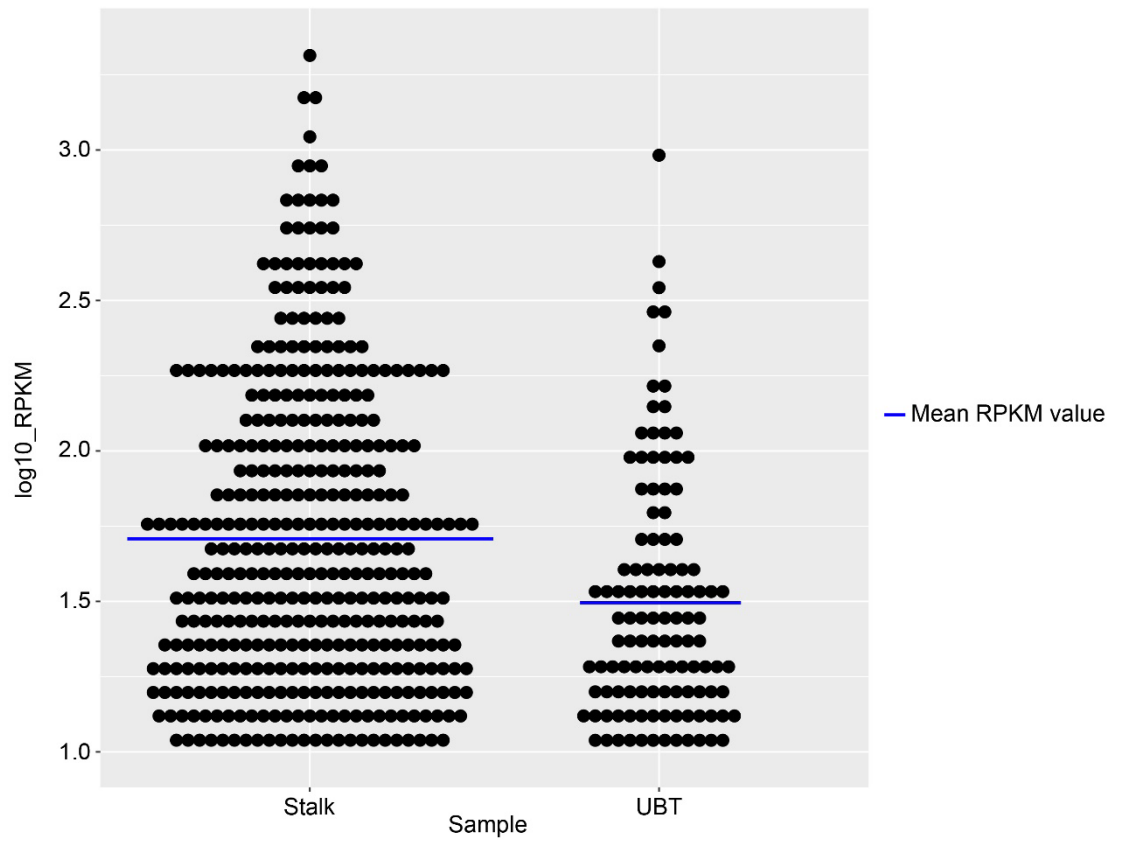

**Fig. S1:** Dot plot of the RPKM values for the UBT- and stalk-enriched genes.

**Table S1:** UBT-enriched genes identified by RNA sequencing of FACS-enriched cell populations analyzed by *in situ* hybridization

| Gene          | FC    | RPKM   | Gene          | FC   | RPKM   | Gene          | FC   | RPKM   |
|---------------|-------|--------|---------------|------|--------|---------------|------|--------|
| Wnt11         | 55.57 | 426.25 | Mfsd2a        | 9.43 | 13.97  | Rps3          | 6.18 | 14.05  |
| Stra6         | 49.12 | 31.91  | Hs3st3b1      | 9.40 | 108.65 | Psmc3ip       | 6.15 | 11.73  |
| 4931406C07Rik | 48.64 | 38.95  | F930015N05Rik | 9.38 | 20.89  | Serpine2      | 6.13 | 27.06  |
| Adamts18      | 47.47 | 15.25  | Gm14133       | 9.36 | 11.53  | Rhoj          | 6.13 | 13.53  |
| Etv4          | 33.10 | 130.48 | Ror2          | 9.31 | 15.10  | Stmn1         | 6.12 | 10.17  |
| Etv5          | 32.74 | 115.23 | Chadl         | 8.66 | 25.18  | Fn1           | 6.09 | 40.22  |
| Hs3st3a1      | 32.44 | 39.18  | Epha4         | 8.64 | 14.55  | 4930503L19Rik | 6.00 | 16.47  |
| Crlf1         | 31.87 | 168.84 | Kdm2b         | 8.57 | 100.50 | Cdca7l        | 5.99 | 57.90  |
| Crispld2      | 30.24 | 20.32  | Arnt2         | 8.52 | 31.66  | Drd4          | 5.99 | 10.45  |
| Sox8          | 29.46 | 11.21  | Akl           | 8.09 | 10.94  | Cpxm1         | 5.95 | 11.95  |
| Fbln2         | 25.07 | 34.82  | Nkain1        | 8.04 | 20.31  | Tmpo          | 5.90 | 13.77  |
| Ret           | 24.89 | 122.26 | Rprm          | 7.98 | 348.98 | Ros1          | 5.82 | 23.84  |
| Wif1          | 22.10 | 11.02  | Ccnd1         | 7.85 | 91.55  | Acot7         | 5.81 | 31.50  |
| Slc27a6       | 20.88 | 42.39  | Asb4          | 7.83 | 25.76  | 2810417H13Rik | 5.77 | 69.79  |
| Kcnn4         | 20.09 | 22.93  | Tcf7          | 7.63 | 17.64  | Fbln1         | 5.73 | 30.14  |
| Cxcl14        | 18.88 | 55.33  | Ung           | 7.62 | 21.50  | Spred1        | 5.69 | 29.50  |
| Cpa2          | 18.39 | 19.00  | Capn6         | 7.56 | 151.22 | Vldlr         | 5.67 | 32.27  |
| Tmem59l       | 18.13 | 21.58  | Dctd          | 7.55 | 36.98  | Gpc3          | 5.66 | 223.69 |
| Rbp1          | 18.09 | 47.76  | Nsg1          | 7.38 | 10.76  | Ncapg         | 5.61 | 17.88  |
| Lcn2          | 17.50 | 77.24  | Socs2         | 7.09 | 13.84  | Lhx1          | 5.59 | 18.45  |
| Nkd1          | 16.00 | 10.82  | Pcbp4         | 7.00 | 88.78  | Nasp          | 5.55 | 70.02  |
| Moxd1         | 15.98 | 43.02  | Abcc4         | 6.99 | 12.27  | Leprel2       | 5.52 | 12.08  |
| Gulo          | 13.33 | 12.43  | Gpc6          | 6.91 | 19.05  | Igfbp4        | 5.44 | 80.15  |
| Ppp1r1b       | 13.30 | 27.89  | Axin2         | 6.90 | 17.26  | Spred2        | 5.41 | 32.74  |
| Slco4c1       | 13.17 | 67.26  | Mest          | 6.78 | 285.68 | Panx1         | 5.39 | 14.90  |
| Metrn         | 13.13 | 32.57  | Cadm1         | 6.75 | 43.26  | Cdca7         | 5.34 | 31.54  |
| Col9a3        | 12.80 | 29.29  | Fbn2          | 6.71 | 28.27  | Nrtm          | 5.30 | 48.96  |
| H2-Ab1        | 12.37 | 13.37  | Calb1         | 6.64 | 294.45 | Khdrbs3       | 5.28 | 19.71  |
| Rps14         | 11.97 | 32.43  | Eef1a1        | 6.58 | 102.41 | Gm12397       | 5.24 | 90.74  |
| Ctnnd2        | 11.65 | 16.37  | Frem2         | 6.47 | 97.42  | Bub1          | 5.24 | 19.81  |
| Mycn          | 11.07 | 16.09  | Sfrp2         | 6.41 | 12.88  | Gfra1         | 5.18 | 160.10 |
| Mdk           | 10.96 | 961.80 | Tenm3         | 6.39 | 15.35  | Dok6          | 5.16 | 10.01  |
| Spry4         | 10.56 | 12.86  | Pkdcc         | 6.38 | 46.79  | Dtl           | 5.13 | 23.69  |
| Trib2         | 10.22 | 12.16  | Psrc1         | 6.30 | 15.76  | Ttk           | 5.12 | 11.70  |
| B4galnt4      | 10.21 | 18.17  | S100a16       | 6.28 | 37.68  | Pbk           | 5.10 | 33.24  |
| Kank4         | 10.17 | 19.75  | Uhrf1         | 6.27 | 21.78  | D17H6S56E-5   | 5.10 | 25.40  |
| Sema6a        | 10.02 | 14.66  | Pgm2l1        | 6.25 | 15.22  | Cachd1        | 5.10 | 19.93  |
| Vstm5         | 9.87  | 14.36  | Fxyd6         | 6.23 | 14.38  | Cib2          | 5.08 | 30.02  |
| Nnat          | 9.49  | 107.79 | Gja1          | 6.20 | 31.48  |               |      |        |

FC = fold change, RPKM = reads per kilobases per million

**Table S2**

[Click here to Download Table S2](#)

**Table S3:** Comparative analysis of mouse UBT expression with LBTs and SGTs

| UBT, LBT, and SBT     | UBT and LBT           | UBT and SBT Tip      | UBT Only                    |
|-----------------------|-----------------------|----------------------|-----------------------------|
| Abcc4                 | Cachd1                | 2810417H13Rik        | Axin2                       |
| Acot7 <sup>1</sup>    | Ctnnd2                | Crispld2             | 4931406C07Rik* <sup>o</sup> |
| Adamts18 <sup>1</sup> | Dtl                   | Etv4                 | Calb1                       |
| Ak1*                  | Epha4                 | Fbln2                | Capn6                       |
| Arnt2                 | Fbn2*                 | Hs3st3b1*            | Chad1* <sup>o</sup>         |
| B4galnt4              | Frem2                 | Kcnn4                | Cib2                        |
| Cadm1*                | Gm12397* <sup>o</sup> | Khdrbs3*             | Cxcl14                      |
| Ccnd1                 | Kdm2b* <sup>o</sup>   | Metrn                | Dok6 <sup>o</sup>           |
| Cdca7                 | Mfsd2a* <sup>o</sup>  | Moxd1*               | Fxyd6                       |
| Cdca7l                | Mycn                  | Panx1                | Gfra1                       |
| Col9a3                | Nkain1* <sup>o</sup>  | Ppp1r1b <sup>1</sup> | Kank4* <sup>o</sup>         |
| Crlf1                 | Ret* <sup>o</sup>     | Rbp1                 | Lcn2                        |
| D17H6S56E-5           | Stmn1                 | Slco4c1 <sup>1</sup> | Lhx1                        |
| Dctd                  |                       | Socs2*               | Mest                        |
| Etv5                  |                       | Spred1*              | Nnat                        |
| Gja1 <sup>1</sup>     |                       | Spred2               | Pgm2l1                      |
| Hs3st3a1 <sup>o</sup> |                       | Ttk                  | Pkdcc*                      |
| Mdk <sup>1</sup>      |                       | Vldlr                | Ros1                        |
| Nasp                  |                       | Vstm5* <sup>o</sup>  | Rprm                        |
| Pbk                   |                       | Wif1 <sup>o</sup>    | Sfrp2                       |
| Pcbp4                 |                       |                      | Slc27a6                     |
| Sema6a                |                       |                      | Sox8                        |
| Tmem59l*              |                       |                      | Stra6                       |
| Tmpo <sup>1</sup>     |                       |                      | Tcf7                        |
| Uhrf1                 |                       |                      | Wnt11                       |
| Ung                   |                       |                      |                             |

\* Not confirmed by Eurexpress

<sup>o</sup> Not confirmed by SGMAP<sup>1</sup> Confirmed by Eurexpress, ratio less than 1.15 on SGMAP

**Table S4:** UBT-enriched genes associated with aspects of kidney branching morphogenesis

| Signaling Pathways       |        |               | Cellular Processes/Components |                              |                 |
|--------------------------|--------|---------------|-------------------------------|------------------------------|-----------------|
| Receptor tyrosine kinase | Wnt    | Retinoic acid | Cell cycle/proliferation      | Extracellular matrix-related | Calcium-related |
| Dok6                     | Axin2  | Lhx1          | Ccnd1                         | Adamts18                     | Calb1           |
| Etv4                     | Ccnd1  | Mdk           | Cdca7                         | Cadm1                        | Capn6           |
| Etv5                     | Ctnnd2 | Mycn          | Cdca71                        | Col9a3                       | Cib2            |
| Gfra1                    | Kdm2b  | Rbp1          | Mdk                           | Fbln2                        | Fbln2           |
| Ret                      | Mycn   | Stra6         | Mycn                          | Fbn2                         | Fbn2            |
| Sox8                     | Sfrp2  |               | Nasp                          | Frem2                        | Frem2           |
| Spred1                   | Tcf7   |               | Rprm                          | Hs3st3a1                     | Kcnn4           |
| Spred2                   | Wif1   |               | Ttk                           | Hs3st3b1                     | Nnat            |
|                          | Wnt11  |               | Uhrf1                         | Pkdcc                        | Panx1           |

**Table S5: UBT-enriched genes implicated in kidney development**

| Gene     | Name                                                                 | Research/Patient Studies                                                                                                                                                                                                                                                                                                       | Reference                                                     |
|----------|----------------------------------------------------------------------|--------------------------------------------------------------------------------------------------------------------------------------------------------------------------------------------------------------------------------------------------------------------------------------------------------------------------------|---------------------------------------------------------------|
| Arnt2    | Aryl hydrocarbon receptor nuclear translocator 2                     | Patients with deleted Arnt2 have developmental renal abnormalities, including dilated collecting ducts, renal reflux, and poor corticomedullary differentiation.                                                                                                                                                               | Webb <i>et al.</i> , 2013                                     |
| Crispld2 | Cysteine-rich secretory protein LCCL domain containing 2             | Heterozygote mice show a 20% reduction in branching morphogenesis compared to wild type littermates. Suggested to be activated by retinoic acid to promote branching morphogenesis                                                                                                                                             | Quinlan <i>et al.</i> , 2007                                  |
| Crlf1    | Cytokine receptor-like factor 1                                      | Induces epithelial conversion in isolated metanephric mesenchyme when complexed with CLC in rats.                                                                                                                                                                                                                              | Schmidt-Ott <i>et al.</i> , 2005                              |
| Epha4    | Eph receptor A4                                                      | Epha4 <sup>-/-</sup> mice develop hydronephrosis. Epha4 <sup>-/-</sup> ;Epha7 <sup>-/-</sup> mice show distal ureter malformations.                                                                                                                                                                                            | Sallstrom <i>et al.</i> , 2013; Weiss <i>et al.</i> , 2014    |
| Etv4/5   | Ets variant 4/5                                                      | Etv4 <sup>-/-</sup> ;Etv5 <sup>+/-</sup> mice show renal agenesis or hypoplasia due to branching defects.                                                                                                                                                                                                                      | Lu <i>et al.</i> , 2009                                       |
| Gfra1    | Glial cell line derived neurotrophic factor family receptor alpha 1  | Gfra1 <sup>-/-</sup> mice show kidney agenesis. This is was also observed when Gfra1 was deleted specifically within the ureteric epithelium.                                                                                                                                                                                  | Enomoto <i>et al.</i> , 1998; Keefe <i>et al.</i> , 2013      |
| Mdk      | Midkine                                                              | Mdk neutralizing antibodies inhibit nephrogenesis by 50% in rats. Suggested to suppress apoptosis, stimulate cellular proliferation of nephrogenic mesenchymal cells, and suppress UB growth. Maintains viability of isolated mesenchyme without the UB. May play a role in maintaining epithelial progenitor cell population. | Vilar <i>et al.</i> , 2002; Qiu <i>et al.</i> , 2004          |
| Mycn     | V-myc myelocytomatosis viral related oncogene, neuroblastoma derived | Duplications of Mycn have been linked to Wilm's Tumor.                                                                                                                                                                                                                                                                         | Williams <i>et al.</i> , 2015                                 |
| Ret      | Ret proto-oncogene                                                   | Ret <sup>-/-</sup> mice display renal agenesis or severe dysgenesis. RET mutations are associated with CAKUT patients.                                                                                                                                                                                                         | Schuchardt <i>et al.</i> , 1994; Skinner <i>et al.</i> , 2008 |
| Ros1     | Ros1 proto-oncogene                                                  | Antisense knockdown of Ros1 resulted in blunting of the UB tips in mice.                                                                                                                                                                                                                                                       | Liu <i>et al.</i> , 1996                                      |
| Sfrp2    | Secreted frizzled-related protein 2                                  | Competes with Sfrp1 to modulate Wnt signaling. Suggested to stimulate tubule formation by promoting Wnt4.                                                                                                                                                                                                                      | Yoshino <i>et al.</i> , 2001                                  |
| Wnt11    | Wingless-type MMTV integration site family, member 11                | Wnt11 <sup>-/-</sup> mice have hypoplastic kidneys and is suggested that Wnt11 is part of a positive autoregulatory feedback loop with Ret/Gdnf to maintain branching morphogenesis.                                                                                                                                           | Majumdar <i>et al.</i> , 2003                                 |
